# Supplementary material for: An Intramolecular Hydroaminomethylation-Based Approach to Pyrrolizidine Alkaloids under Microwave-Assisted Heating
Source: MDPI journal article supplement (doi:10.3390/molecules27154762), 2022-07-25

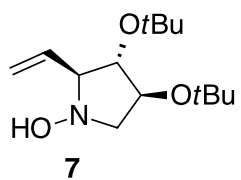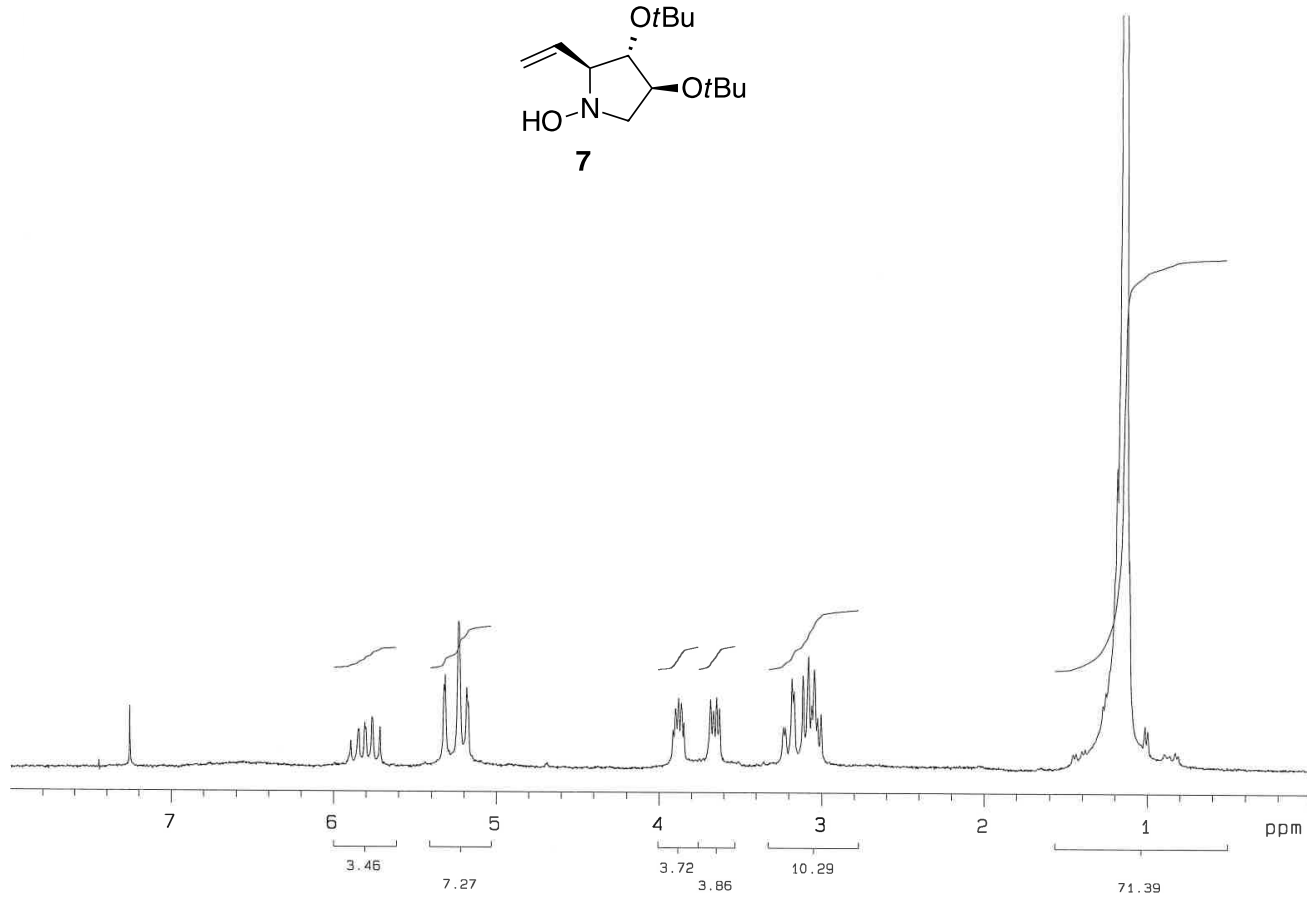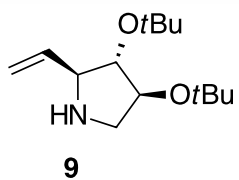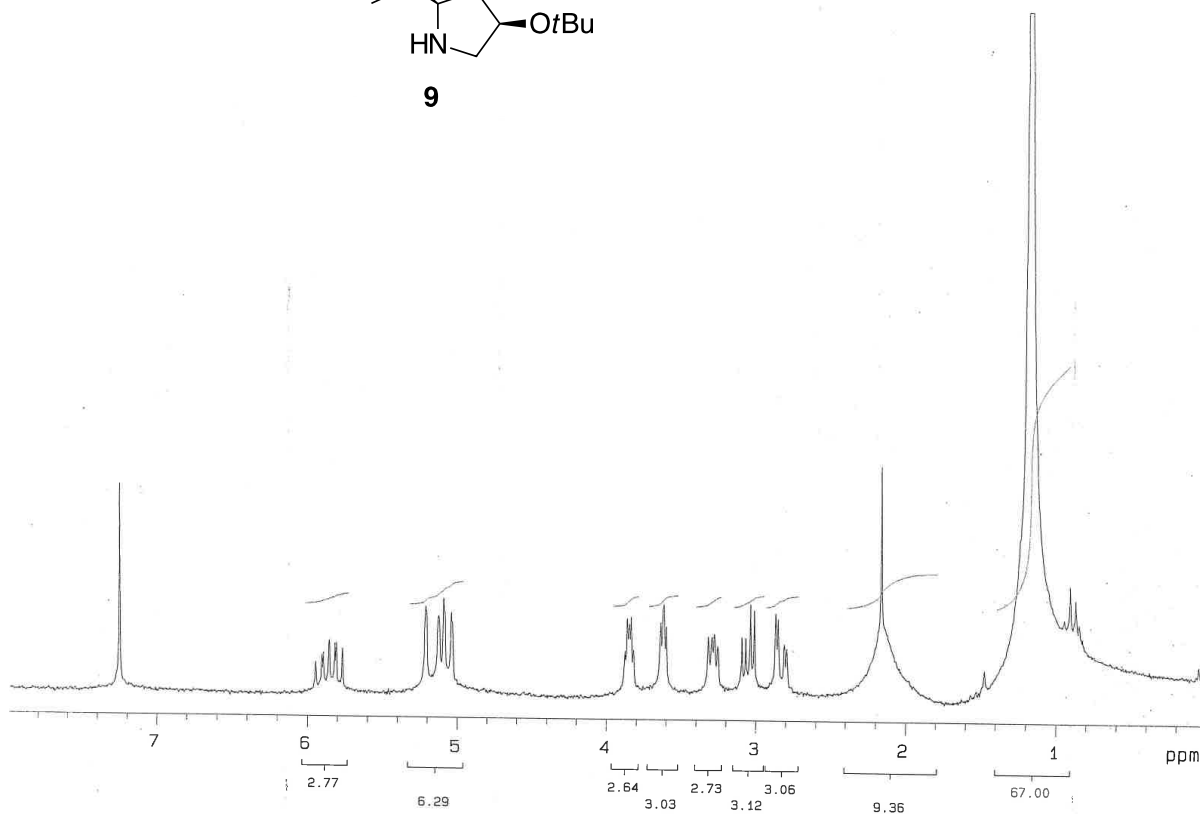

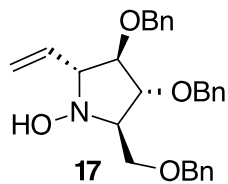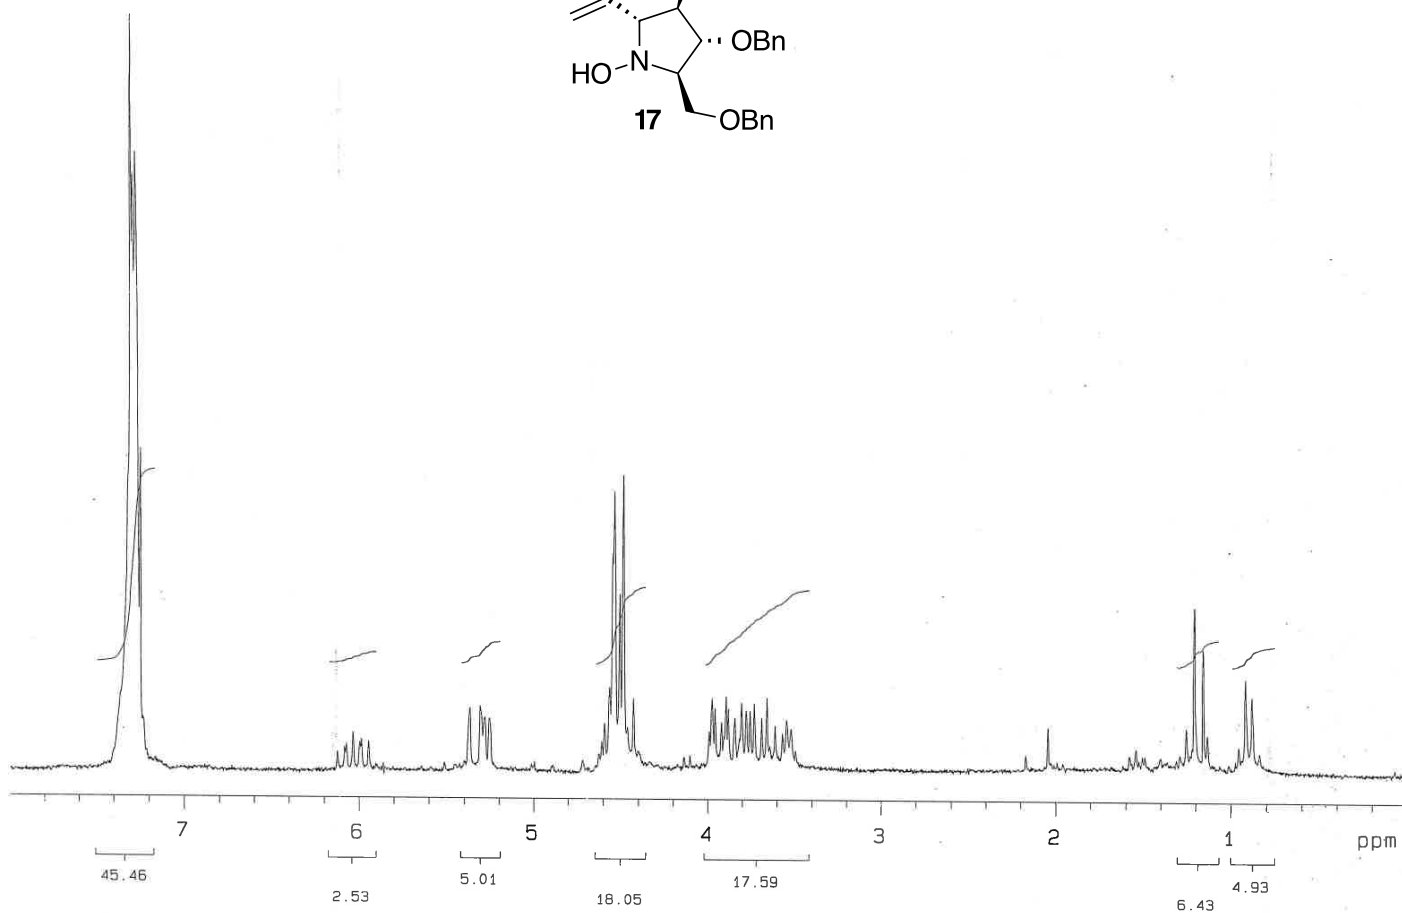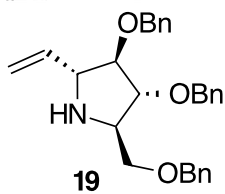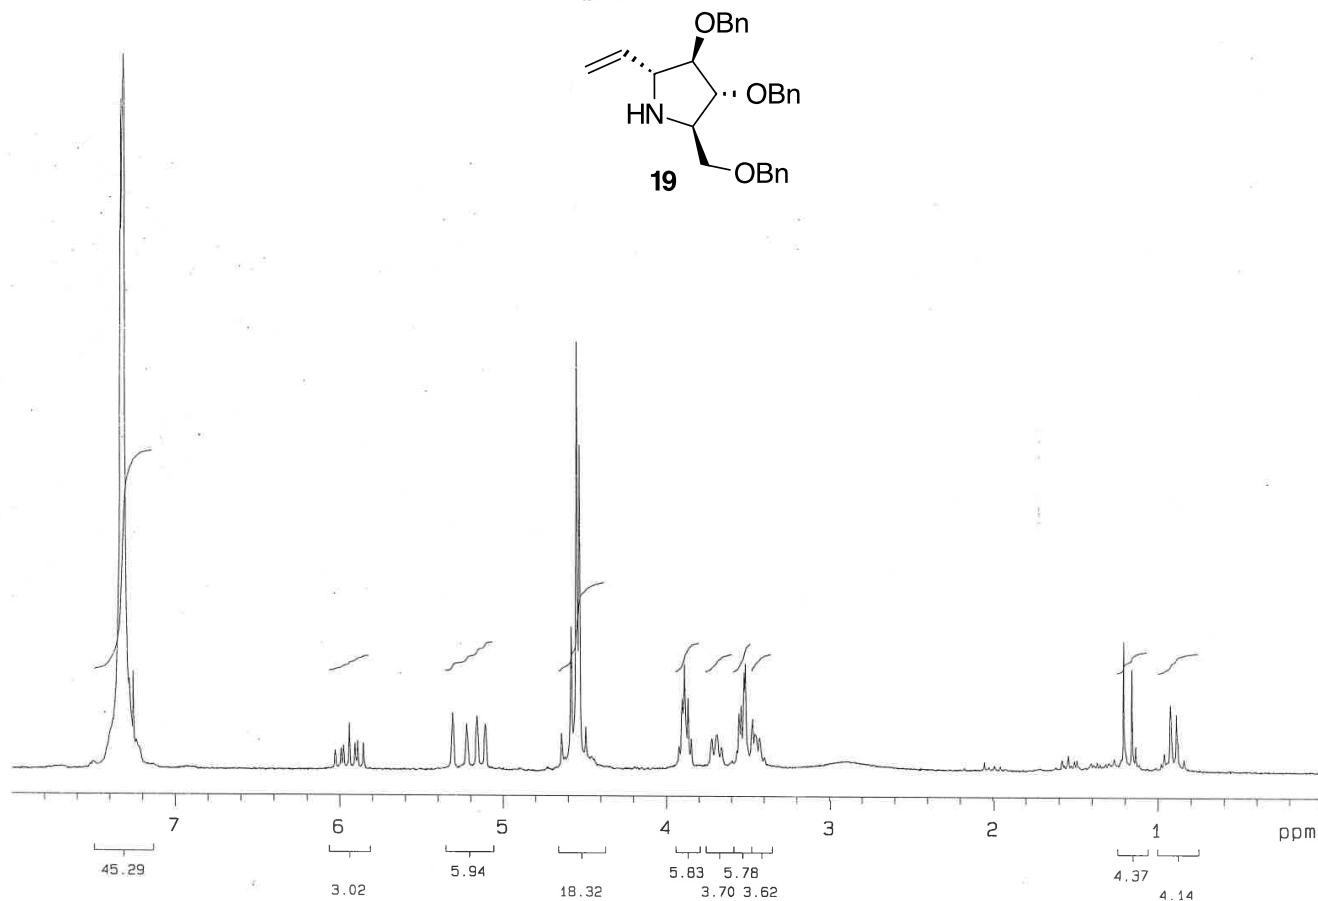

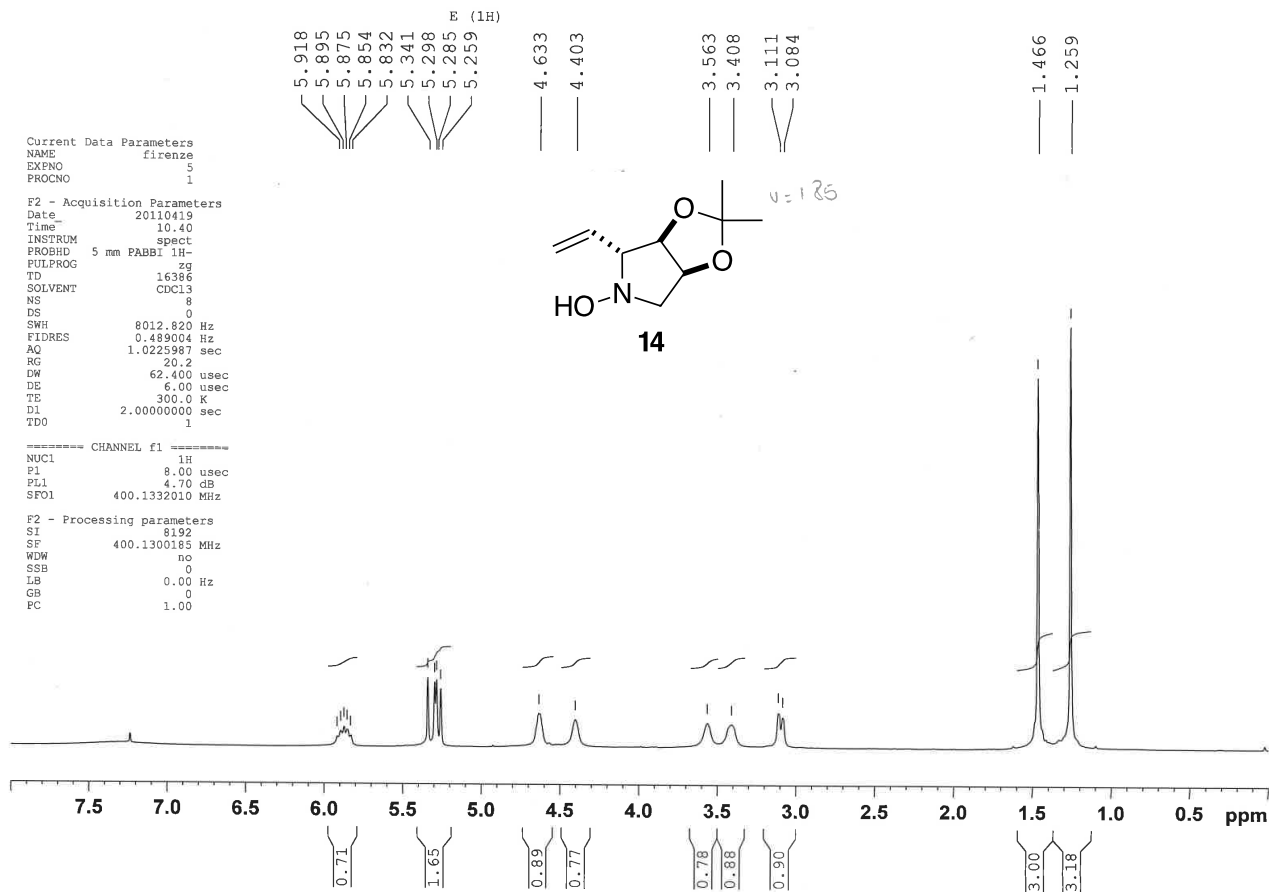

Print of window 80: MS Spectrum

Acq. Operator : ELENA Location : Vial 1

Injection Date : 20-Jun-08, 09:59:18

Acq. Method : TEST.M

Analysis Method : C:\CHEM32\1\METHODS\TEST.M

Last changed : 6/20/2008 9:58:18 AM by MADDA  
 (modified after loading)

MS Spectrum

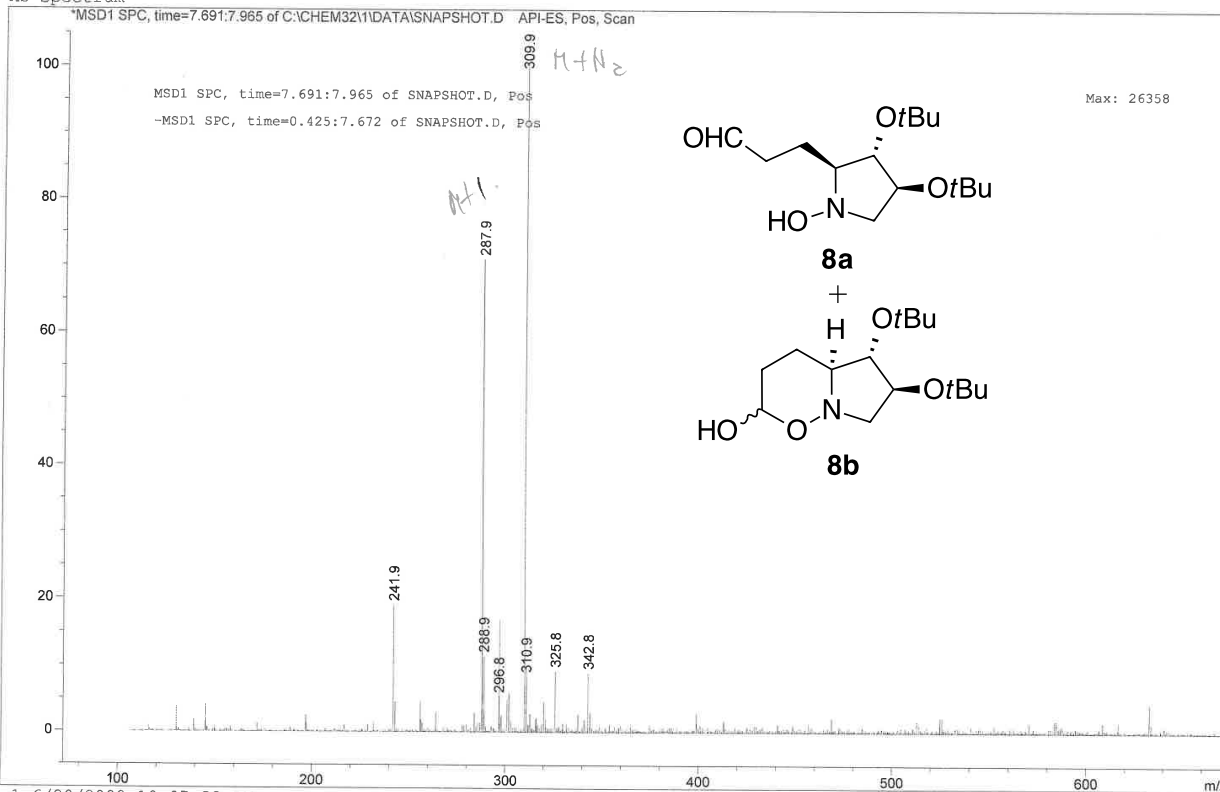

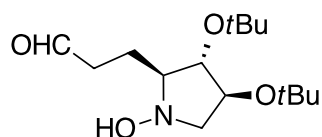

**8a**

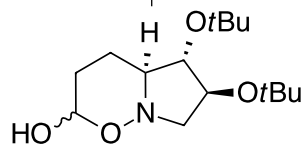

**8b**

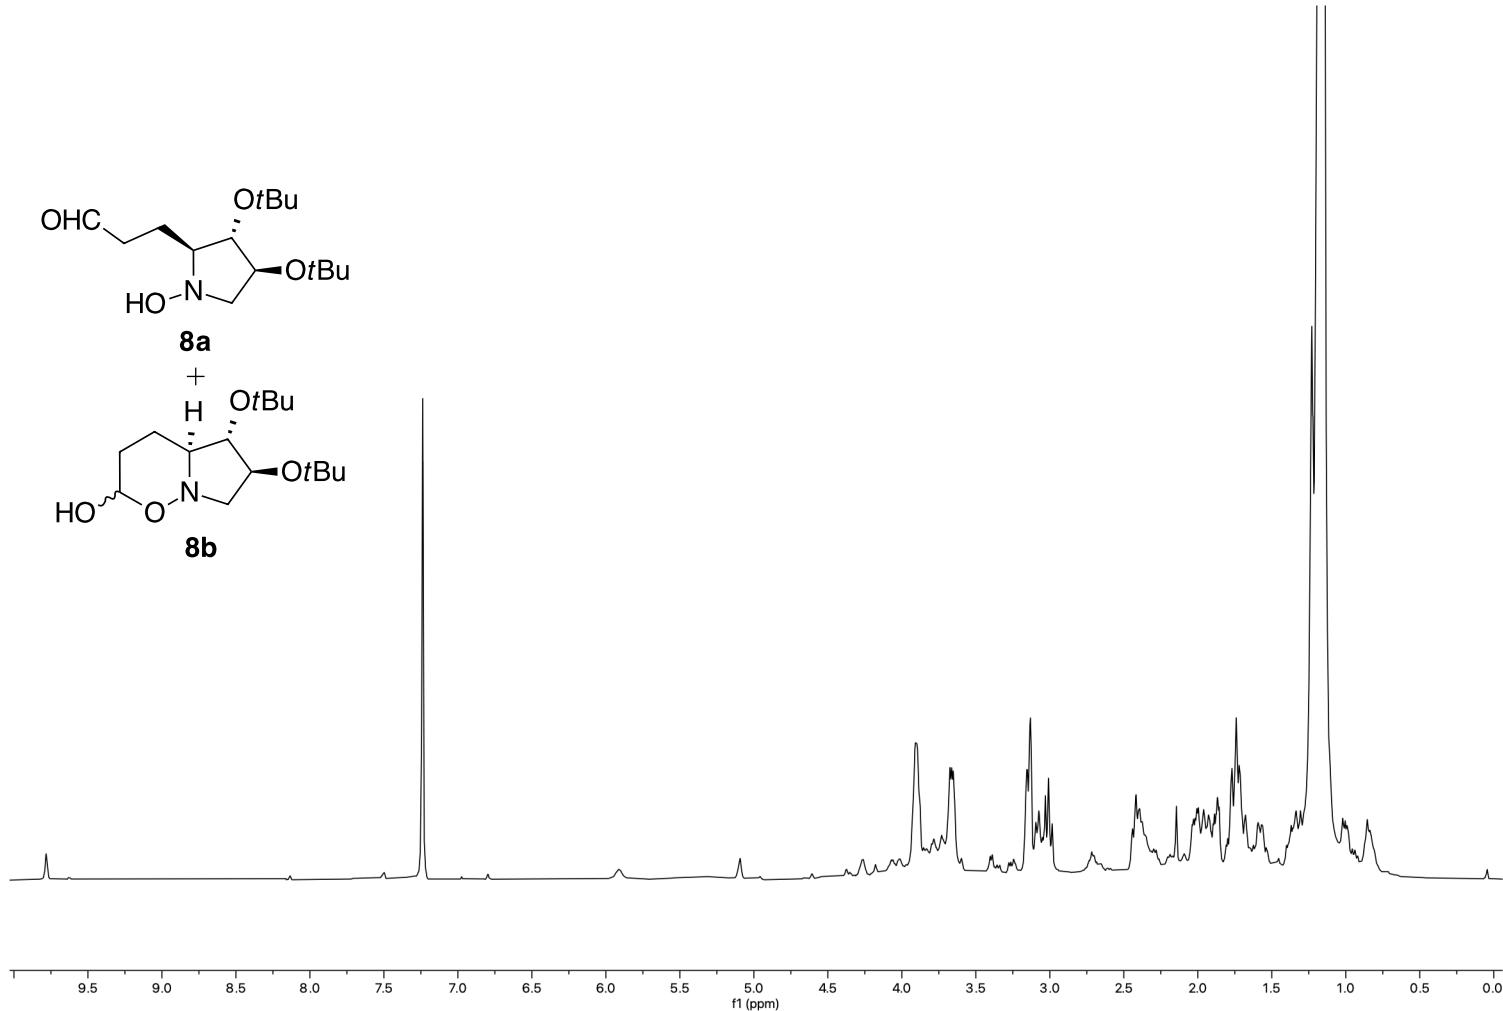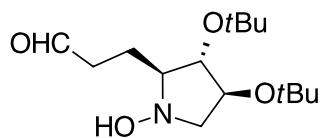

**8a**

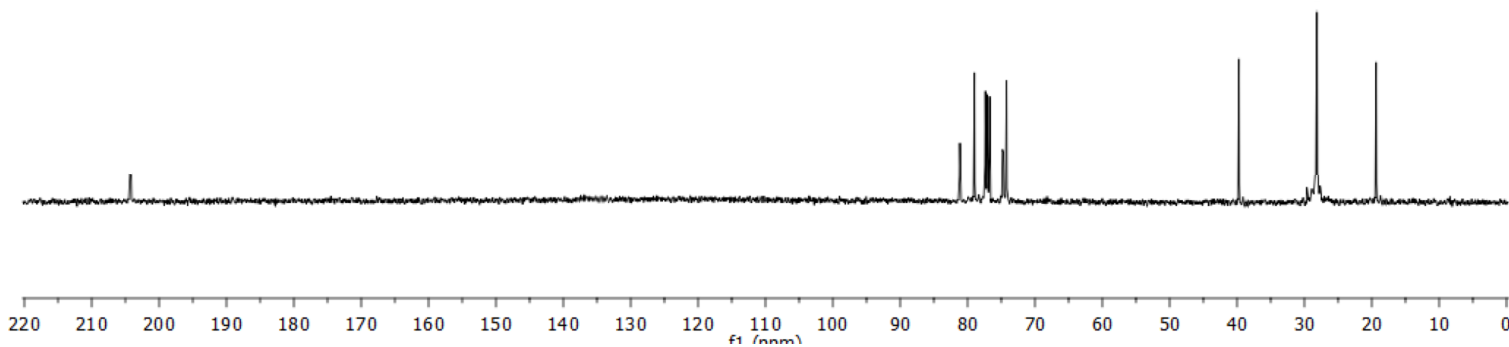

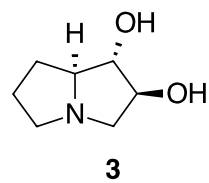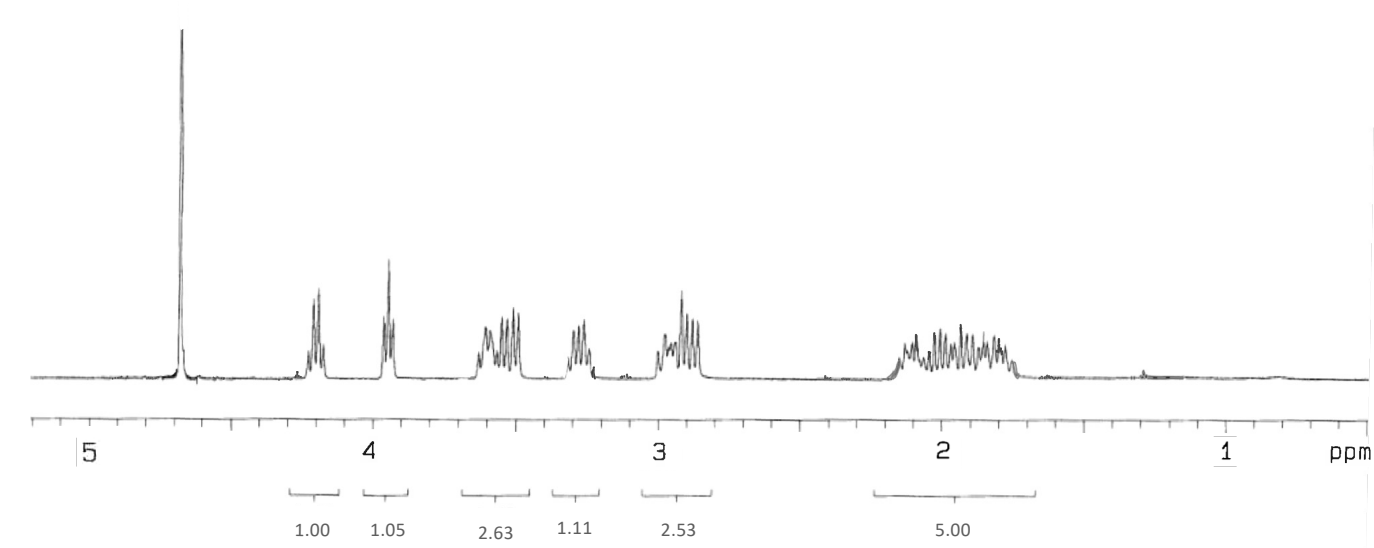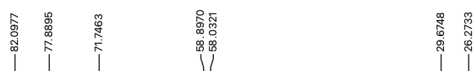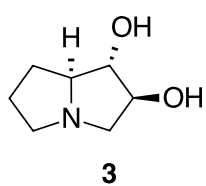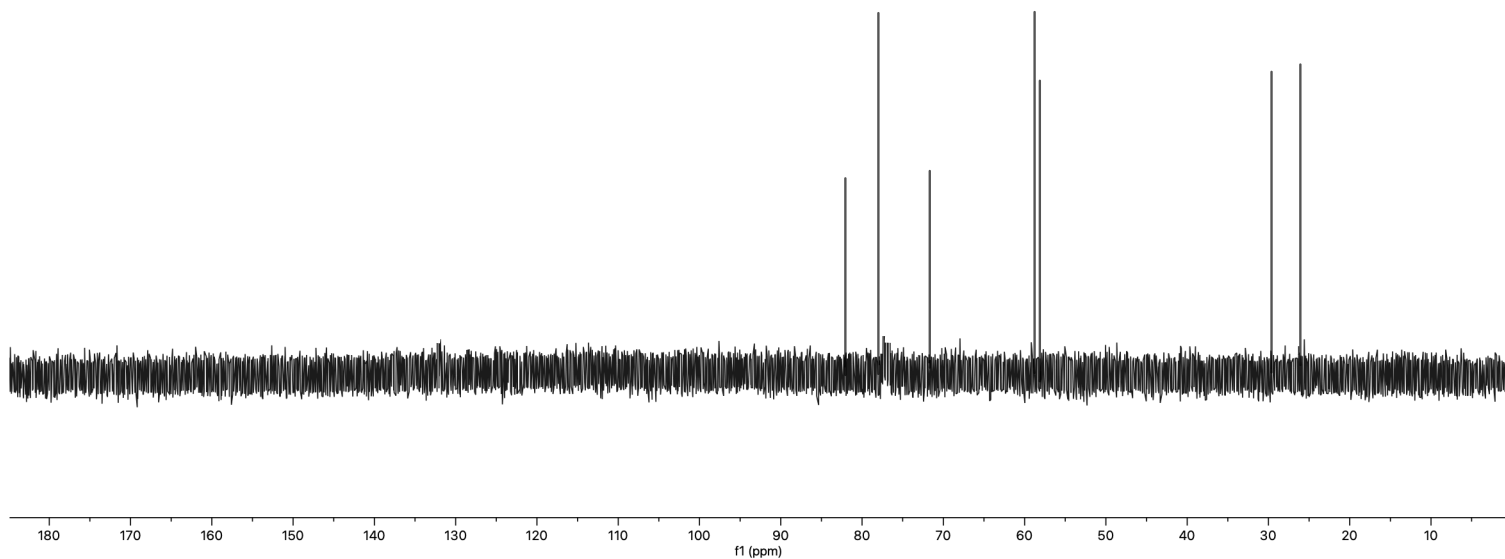

\*MSD1 SPC, time=0.100 of SNAPSHOT.D API-ES, Pos, Scan

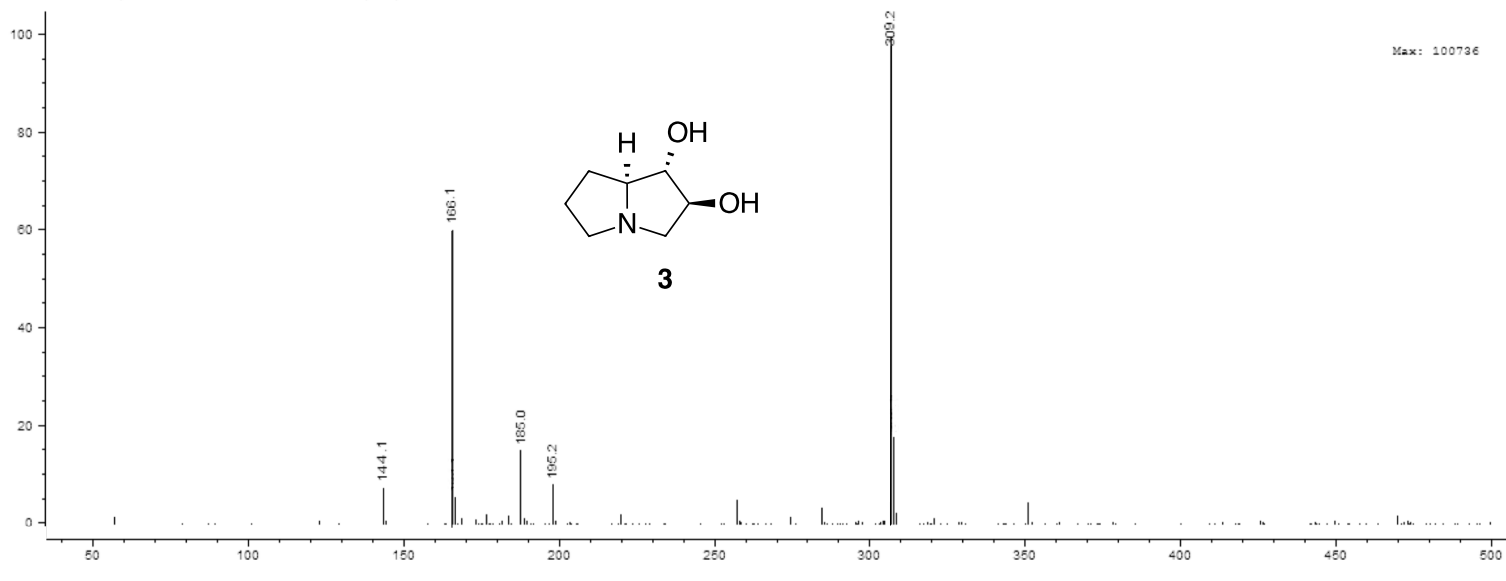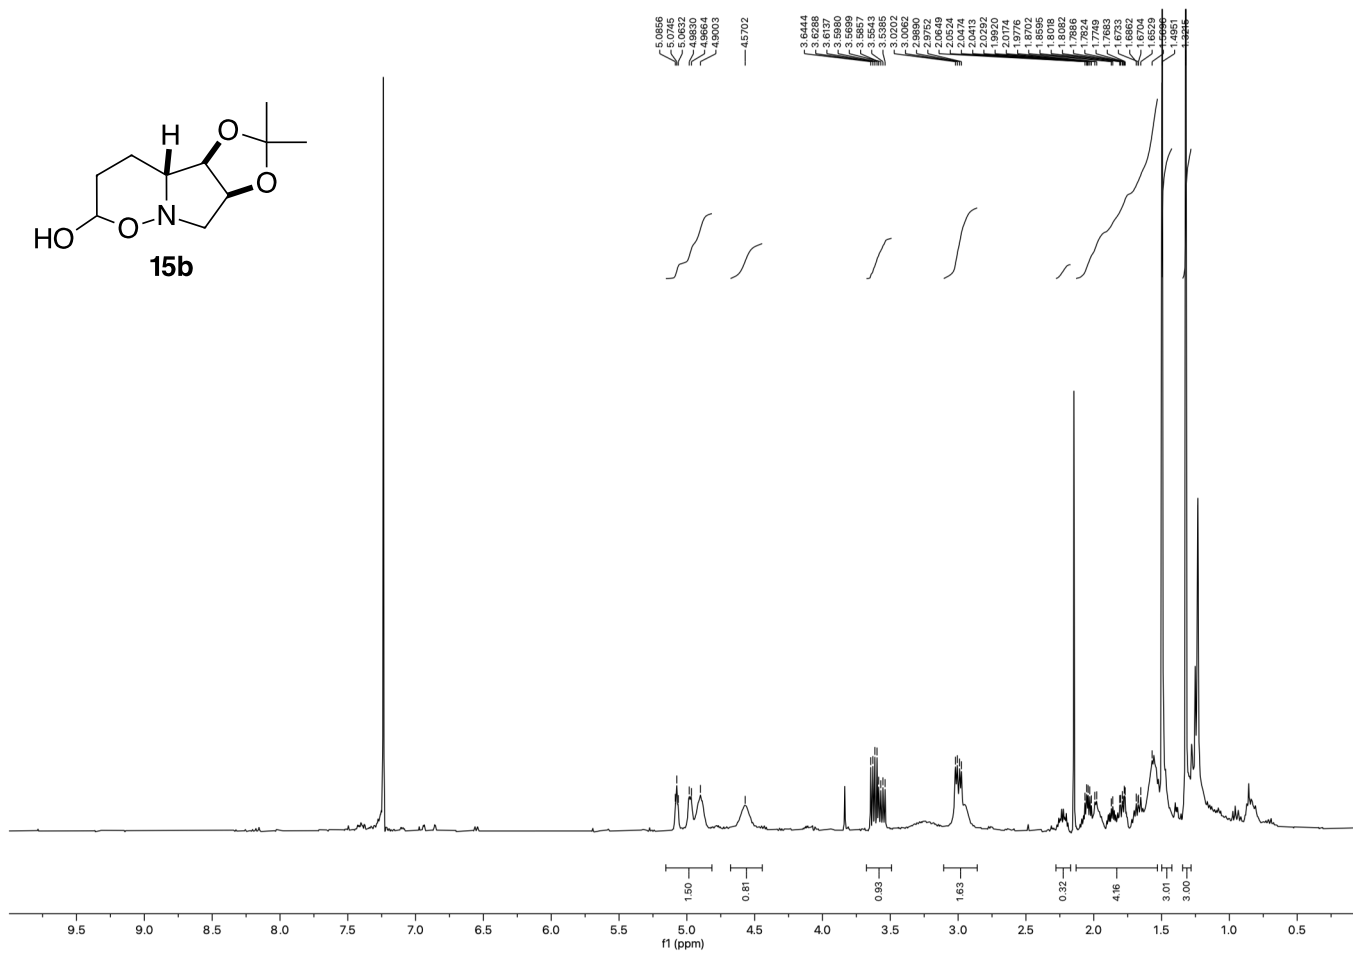

MS Spectrum

MSD1 SPC, time=9.486-9.961 of C:\CHEM32\1\DATA\SNAPSHOT.D API-ES, Pos, Scan

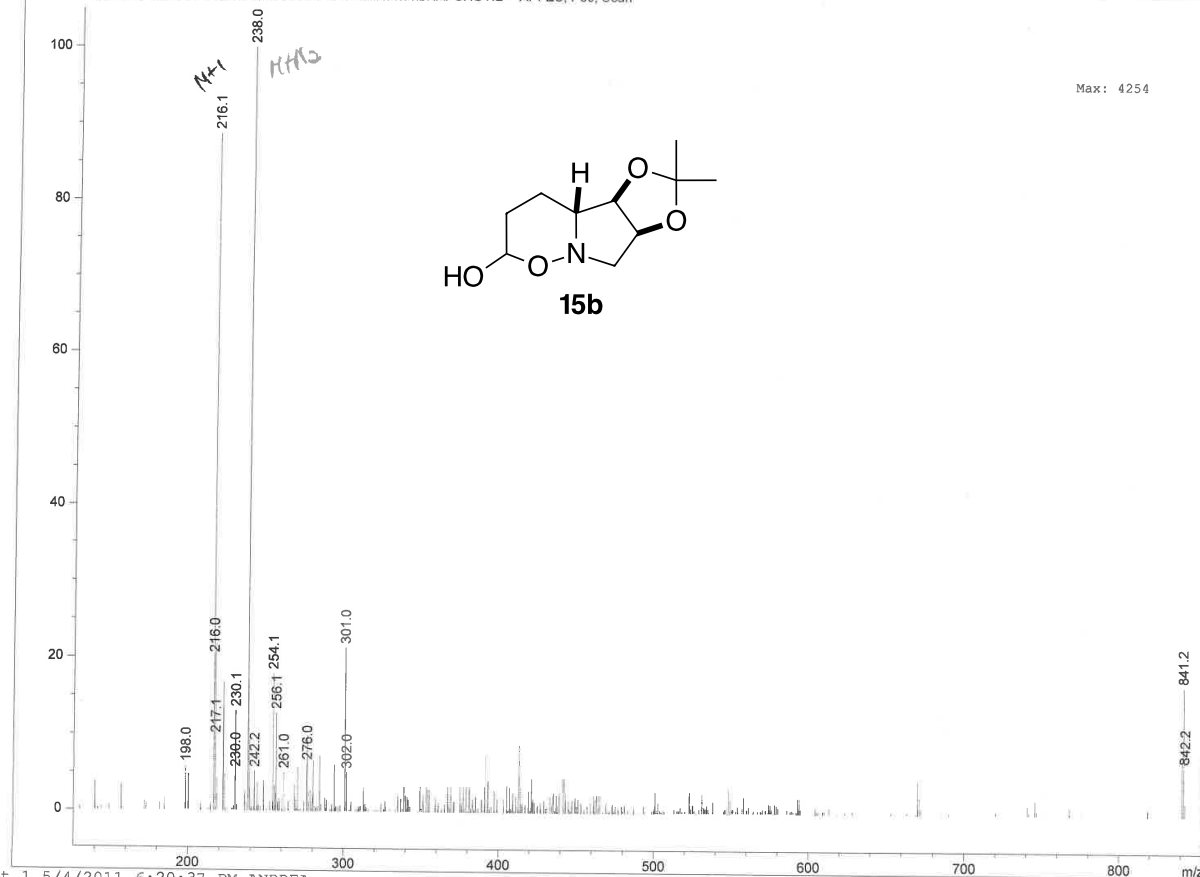

Instrument 1 5/4/2011 6:20:37 PM ANDREA

Page 1 of 1

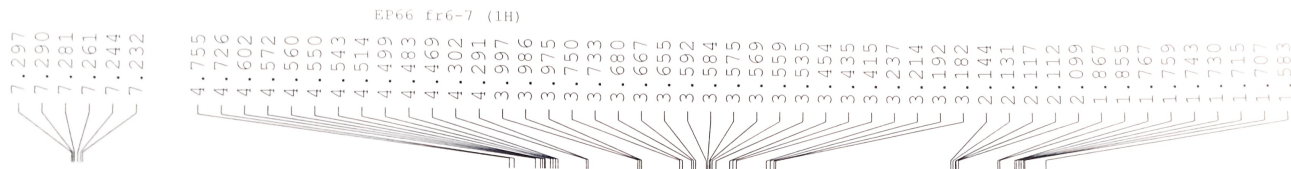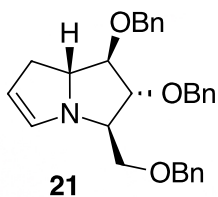

Current Data Parameters  
NAME EP66  
EXPNO 1  
PROCNO 1

F2 - Acquisition Parameters  
Date\_ 20061212  
Time 15.55  
INSTRUM spect  
PROBHD 5 mm FABB1 1H-  
PULPROG zg  
TD 16386  
SOLVENT CDCl3  
NS 16  
DS 0  
SWH 6009.615 Hz  
FIDRES 0.366753 Hz  
AQ 1.3634484 sec  
RG 80.6  
SW 83.200 usec  
DE 6.00 usec  
TE 300.0 K  
D1 2.00000000 sec  
TD0 1

\*\*\*\*\* CHANNEL f1 \*\*\*\*\*  
NUC1 1H  
P1 8.00 usec  
PL1 4.70 dB  
SFO1 400.1318400 MHz

F2 - Processing parameters  
SI 8192  
SF 400.1300185 MHz  
WDW no  
SSB 0  
LB 0.00 Hz  
GB 0  
PC 1.00

7.5 7.0 6.5 6.0 5.5 5.0 4.5 4.0 3.5 3.0 2.5 2.0 1.5 1.0 0.5 ppm

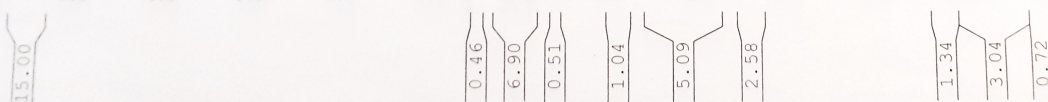

Print of window 80: MS Spectrum

=====

Acq. Operator : alex

Location : Vial 1

Injection Date : 21-Dec-06, 11:20:24

Acq. Method : ACN.M

Analysis Method : C:\CHEM32\1\METHODS\ACN.M

Last changed : 12/21/2006 11:12:58 AM by ale  
(modified after loading)

MS Spectrum

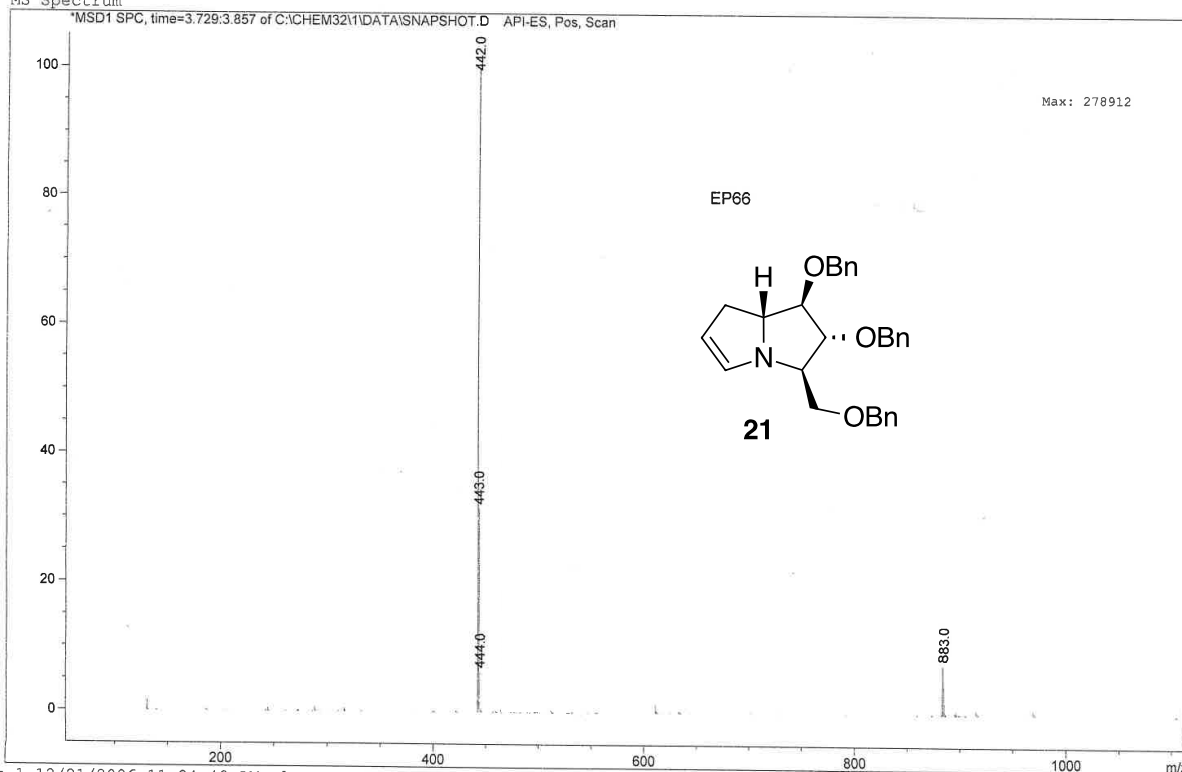

Instrument 1 12/21/2006 11:24:49 AM alex

Page 1 of 1

Print of window 80: MS Spectrum

=====

Acq. Operator : E LENA

Acq. Instrument : Instrument 1

Location : -

Injection Date : 4/15/2008 6:26:27 PM

Inj : 1

Method : C:\CHEM32\1\METHODS\SI0TT.M

Last changed : 4/15/2008 6:04:27 PM by BEA  
(modified after loading)

MS Spectrum

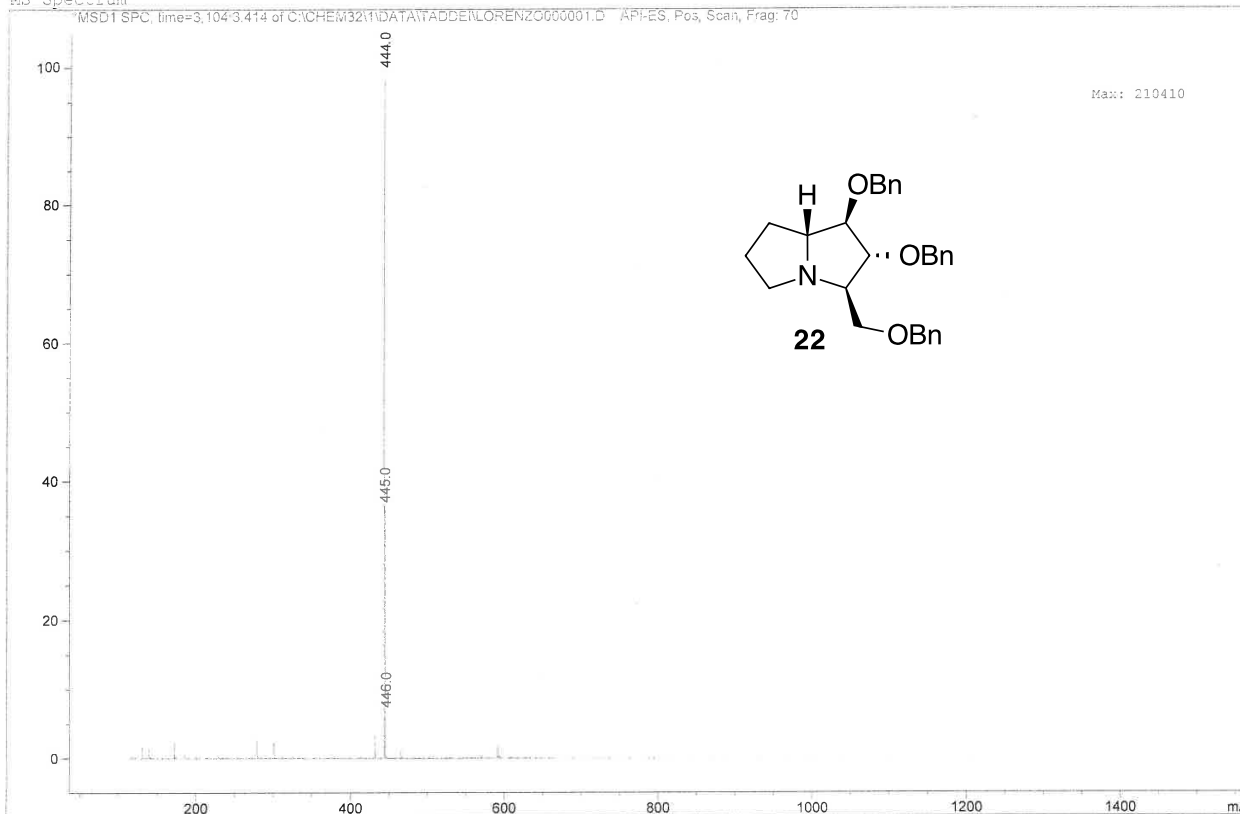

Instrument 1 4/15/2008 6:33:15 PM E LENA

Page 1 of 1



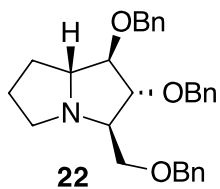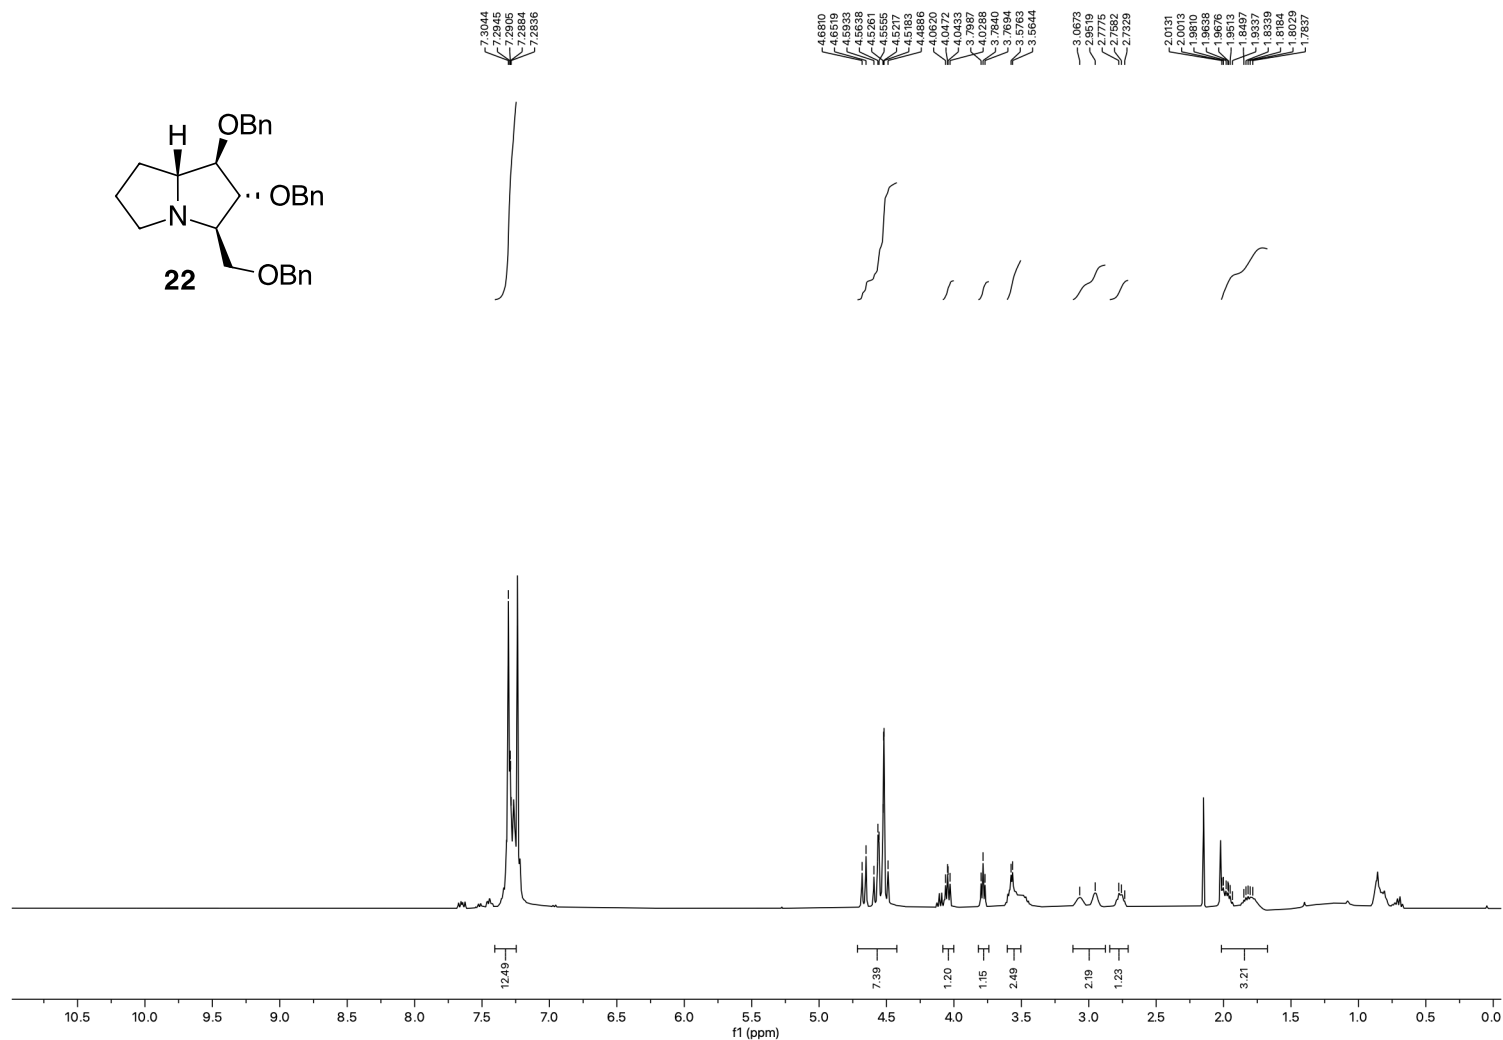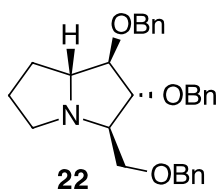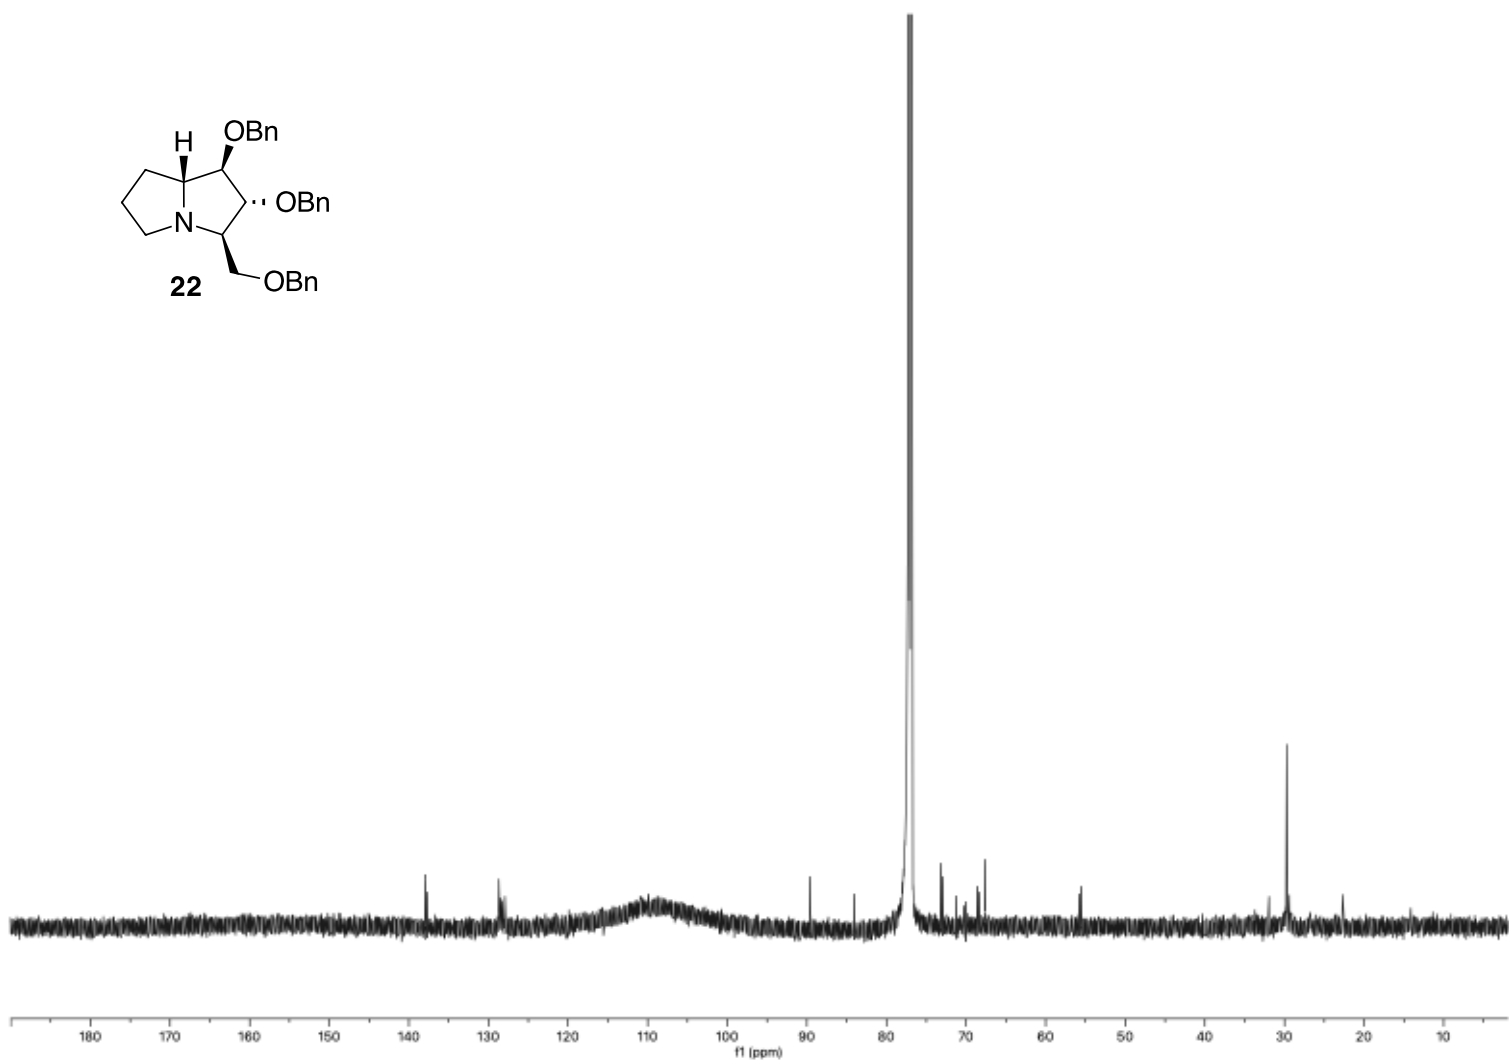

Supplement: s1 [file s1]
